# Supplementary material for: Defective Angiogenesis and Intraretinal Bleeding in Mouse Models With Disrupted Inner Retinal Lamination
Source: PubMed Central journal article supplement — Invest Ophthalmol Vis Sci. 2016 Apr 5;57(4):1563–77. doi: 10.1167/iovs.15-18395 (PMC4824390; doi:10.1167/iovs.15-18395), 2016-04-05
Supplement: i1552-5783-57-4-1563-s01.pdf [file i1552-5783-57-4-1563-s01.pdf]

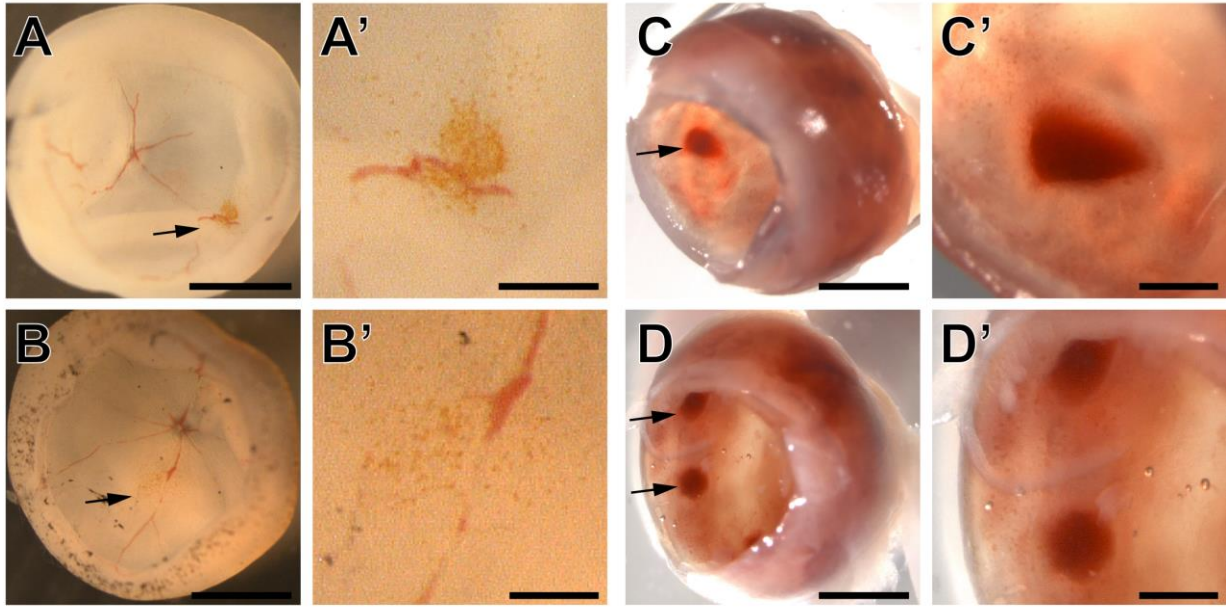

**Supplemental Figure 1. Retinal bleeding when *Dscam* is conditionally targeted within retinal neurons.** Retinal bleeding was observed in retinas where *Dscam* was conditionally deleted from retinal neurons using *Pax6 $\alpha$ -Cre*. This bleeding was from none (not shown), to little (A-B) to severe (C-D). Arrows point to locations of bleeding within the retinas. Scale bars in A, B, C and D = 1mm; in A', B', C' and D' = 200  $\mu$ m.
