# Supplementary material for: Defective Angiogenesis and Intraretinal Bleeding in Mouse Models With Disrupted Inner Retinal Lamination
Source: PubMed Central journal article supplement — Invest Ophthalmol Vis Sci. 2016 Apr 5;57(4):1563–77. doi: 10.1167/iovs.15-18395 (PMC4824390; doi:10.1167/iovs.15-18395), 2016-04-05
Supplement: i1552-5783-57-4-1563-s02.pdf [file i1552-5783-57-4-1563-s02.pdf]

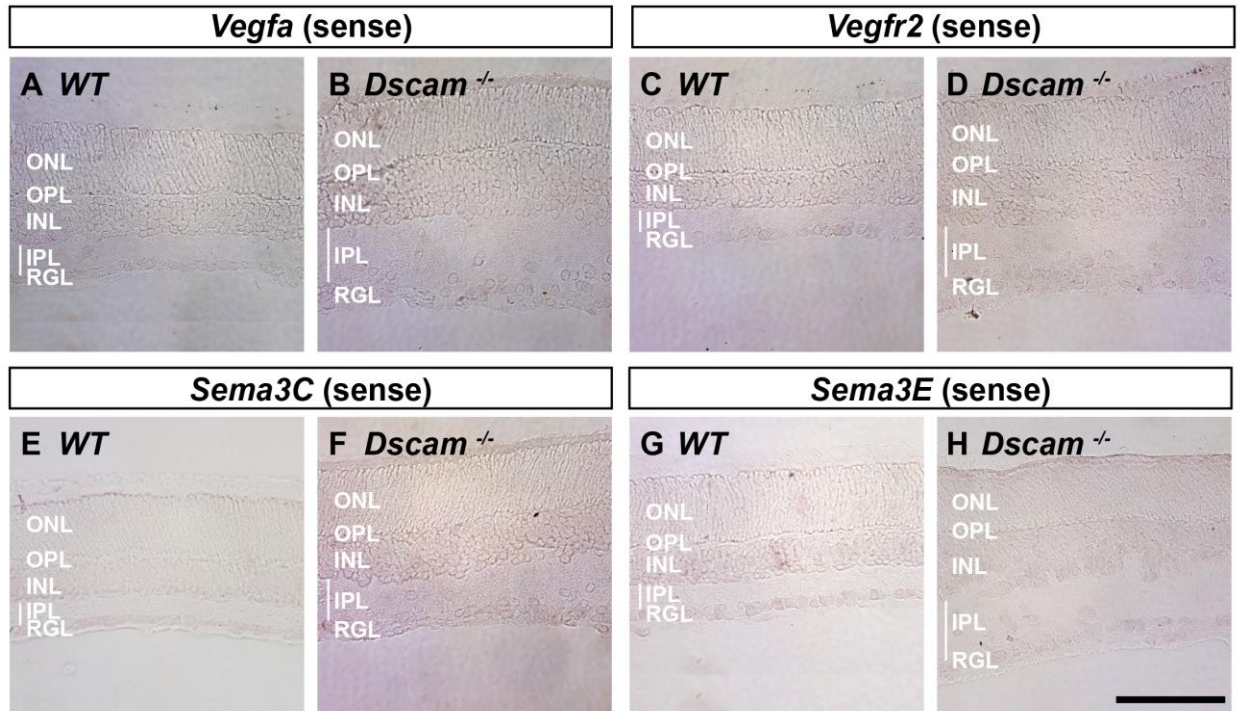

**Supplemental Figure 2. Sense controls for *in-situ* hybridization.** Sense probes were made for each of the antisense probes, as controls. No color reaction was detected in any of the controls. **A-B)** *Vegfa* (sense). **C-D)** *Vegfr2* (sense). **E-F)** *Sema3C* (sense). **G-H)** *Sema3E* (sense). n=4 retinas from 2 mice were analyzed. Abbreviations: INL: inner nuclear layer, IPL: inner plexiform layer, ONL: outer nuclear layer, OPL: outer plexiform layer, RGL: retinal ganglion cell layer. Scale bar in H = 100  $\mu$ m.
